# Supplementary material for: Impact of perceived distances on international tourism
Source: PLOS journal article supplement (doi:10.1371/journal.pone.0225315), 2019-12-04
Supplement: S1 (10.1371/journal.pone.0225315.s001) [file journal.pone.0225315.s001]

## S1 Table

**Alpha parameter for links that have evolved the most and least between 2004 – 08** A simple measure of the strength of evolution of tourism flow  $\alpha_{ij}$  between a pair of countries  $i$  and  $j$  is defined as,

$$\alpha_{ij}(t_n) = \frac{F_{ij}^t(t_n) - F_{ij}^t(t_0)}{F_{ij}^t(t_0)}, \quad (1)$$

where  $t_n$  and  $t_0$  correspond to the end and start of discrete-events in the network dataset (2008 and 2004, respectively), shows that big changes in flow have occurred for a very few links over the years (trailing tail) and  $\approx 30\%$  of the links have shown no change in traffic.

**Table 1.** Combination of countries representing a change of tourism flow between them. The top half illustrates the links that have strengthened from 2004 to 2008. The bottom half are links that have weakened over time. The value measure is  $\alpha$ , a parameter to showcase the change in the flow of tourism from 2004 to 2008 in the International Tourism Network (ITN).

| Origin country       | Destination country | $\alpha_{ij}$ |
|----------------------|---------------------|---------------|
| Macedonia            | Israel              | 881           |
| Laos                 | Cambodia            | 35.75         |
| Tajikistan           | Kyrgyzstan          | 35.23         |
| Rwanda               | Ukraine             | 26.11         |
| Uzbekistan           | Kyrgyzstan          | 17.66         |
| Kuwait               | Israel              | -0.93         |
| Georgia              | Trinidad and Tobago | -0.96         |
| United Arab Emirates | Israel              | -0.96         |
| Saudi Arabia         | Israel              | -0.99         |
| Macau                | Malaysia            | -0.99         |
